# Supplementary material
Source: PubMed Central journal article supplement (PMC8738102)
Supplement: NIHMS1745004-supplement-1.pdf [file NIHMS1745004-supplement-1.pdf]

## Supplementary Information

*for*

### **DisCovER: distance- and orientation-based covariational threading for weakly homologous proteins**

**Sutanu Bhattacharya<sup>1</sup>, Rahmatullah Roche<sup>2</sup>, Bernard Moussad<sup>2</sup>, Debswapna Bhattacharya<sup>2,\*</sup>**

<sup>1</sup>Department of Computer Science, Florida Polytechnic University, Lakeland, FL 33805, USA

<sup>2</sup>Department of Computer Science, Virginia Tech, Blacksburg, VA 24061, USA

\*Corresponding author: Debswapna Bhattacharya

2160N Torgersen Hall, 620 Drillfield Drive, Blacksburg, VA  
24061, USA

Phone: (540) 231-2865

Fax: (540) 231-6075

E-mail: [dbhattacharya@vt.edu](mailto:dbhattacharya@vt.edu)

**Supplementary Fig. S1.** (A) TM-score of DisCovER vs DisCovER<sup>No orientation</sup> on MUSTER dataset. 52.3% of the cases DisCovER outperforms DisCovER<sup>No orientation</sup> whereas 26.7% of the cases DisCovER<sup>No orientation</sup> outperforms DisCovER. (B) TM-score of DisCovER vs DisCovER<sup>No distance</sup> on MUSTER dataset. 54.7% of the cases DisCovER outperforms DisCovER<sup>No distance</sup> whereas 32.6% of the cases DisCovER<sup>No distance</sup> outperforms DisCovER. DisCovER represents the full-fledged variant that incorporates both orientation and distance. DisCovER<sup>No orientation</sup> represents the ablated variant that only incorporates distance but no orientation. DisCovER<sup>No distance</sup> represents the ablated variant of DisCovER that only incorporates orientation but no distance.

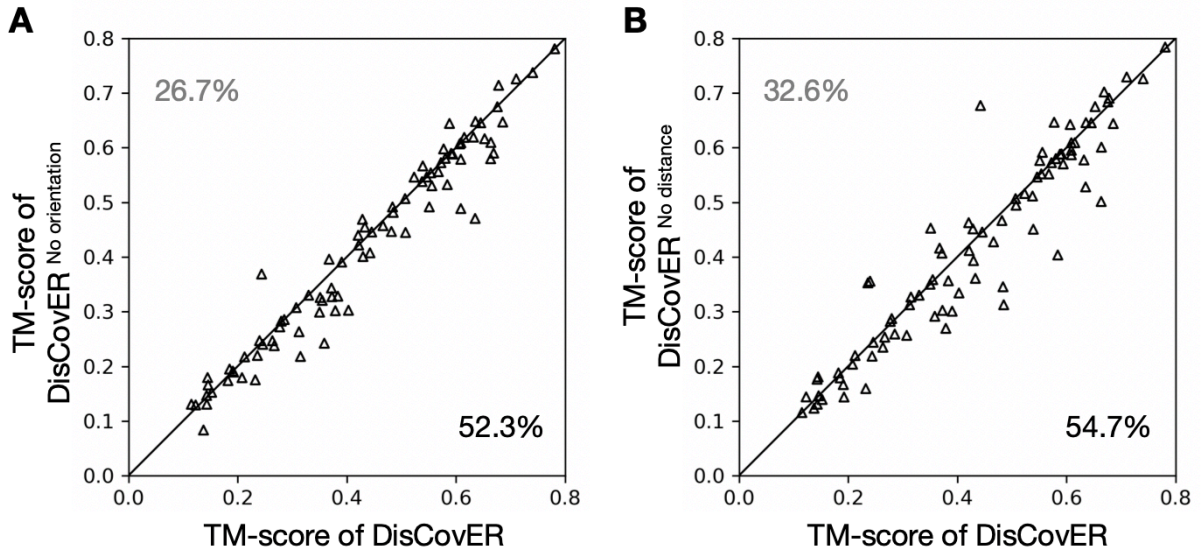

**Supplementary Fig. S2.** TM-score of DisCovER vs Nf (number of sequence homologs) on (A) 117 hard targets from CAMEO having a Spearman correlation of 0.23, (B) 304 easy targets from CATHER having a Spearman correlation of 0.19, (C) 45 medium targets from CATHER having a Spearman correlation of 0.16, (D) 131 hard targets from CATHER having a Spearman correlation of 0.25.

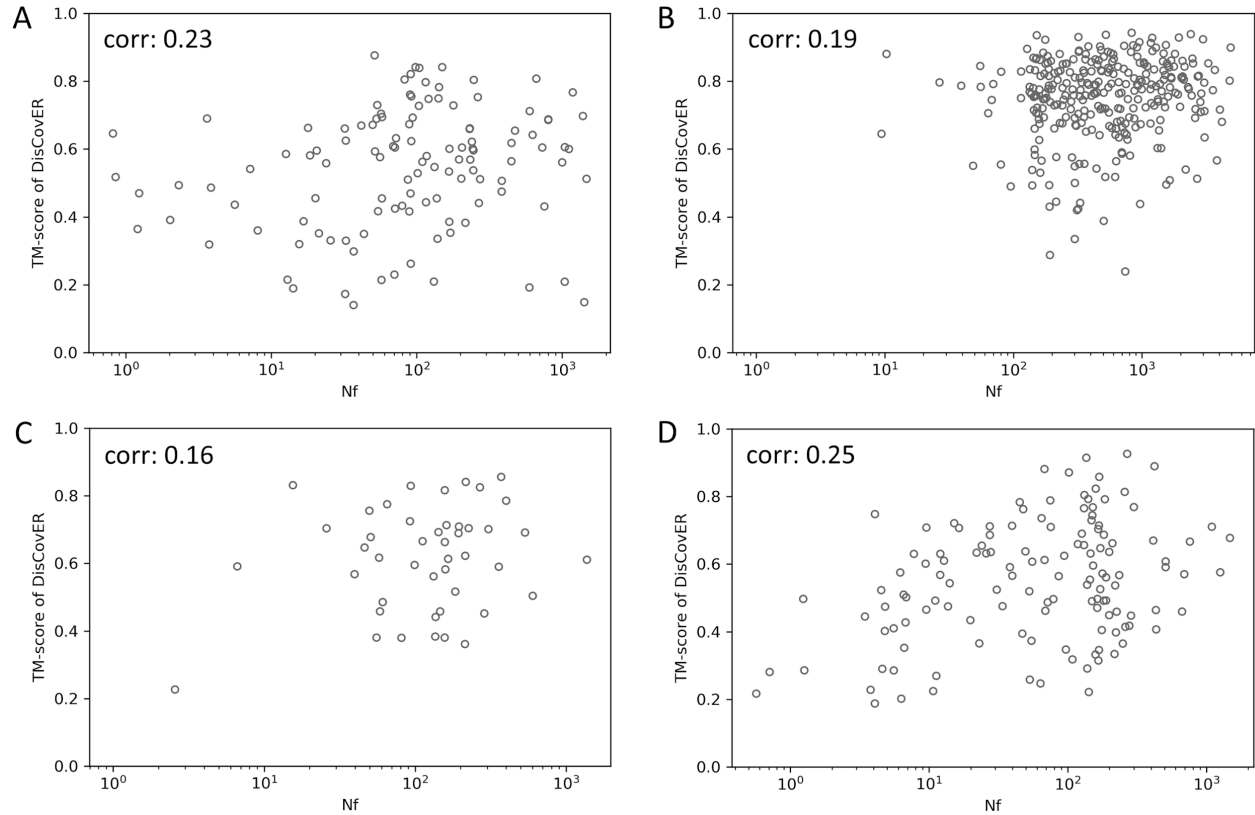

**Supplementary Table S1.** Contribution of individual features to DisCovER performance on CAMEO targets 5ZER\_B and 6D7Y\_B. The performance is measured by TM-score. Bold values represent the best performance. Nf defines the number of effective sequence homologs.

| Target (Type)            | Nf    | DisCovER <sup>No</sup><br>neighborhood, No<br>geometry <sup>†</sup> | DisCovER <sup>No</sup><br>geometry <sup>†</sup> | DisCovER <sup>No</sup><br>distance | DisCovER <sup>No</sup><br>orientation | DisCovER     |
|--------------------------|-------|---------------------------------------------------------------------|-------------------------------------------------|------------------------------------|---------------------------------------|--------------|
| 5ZER_B<br>(hard)         | 104.3 | 0.782                                                               | 0.797                                           | 0.798                              | 0.802                                 | <b>0.826</b> |
| 6D7Y_B<br>(very<br>hard) | 21.3  | 0.292                                                               | 0.307                                           | 0.330                              | 0.372                                 | <b>0.446</b> |

<sup>†</sup>geometry includes distance and orientation information.

**Supplementary Table S2.** Performance comparison of DisCovER and AlphaFold2 on representative CAMEO targets 7APJ\_B and 7D8B\_B. Bold values represent the best performance.

| Target details              |                   |        | TM-score            |                       |                         |
|-----------------------------|-------------------|--------|---------------------|-----------------------|-------------------------|
| Target (Submission date)    | Type <sup>†</sup> | Length | HHpred <sup>a</sup> | DisCovER <sup>b</sup> | AlphaFold2 <sup>c</sup> |
| 7APJ_B<br>(August 21, 2021) | Easy              | 126    | 0.769               | <b>0.913</b>          | 0.896                   |
| 7D8B_B<br>(August 21, 2021) | Medium            | 161    | 0.487               | 0.847                 | <b>0.873</b>            |

<sup>†</sup> officially classified by CAMEO

<sup>a</sup> Jobs were submitted to HHpred webserver (<https://toolkit.tuebingen.mpg.de>) using default parameters and the default template library (PDB\_mmCIF70\_13\_Jul)

<sup>b</sup> Template library, containing 70 670 templates, curated in 2018, significantly older than the submission date of both targets.

<sup>c</sup> Jobs were submitted to AlphaFold2 Colab notebook (<https://colab.research.google.com/github/deepmind/alphafold/blob/main/notebooks/AlphaFold.ipynb>) using default parameter settings.
